# Supplementary material for: Enhanced anomalous Hall effect in Fe nanocluster assembled thin films
Source: Royal Society of Chemistry journal article supplement (doi:10.1039/c4cp01493f), 2014-05-21
Supplement: c4cp01493f1.pdf [file c4cp01493f1.pdf]

## Enhanced anomalous Hall effect in Fe nanocluster assembled thin films

Junbao Wang,<sup>a</sup> Wenbo Mi,<sup>\*b</sup> Laisen Wang,<sup>a</sup> Qinfu Zhang,<sup>a</sup> Dongliang Peng<sup>\*a</sup>

### Supporting Display items

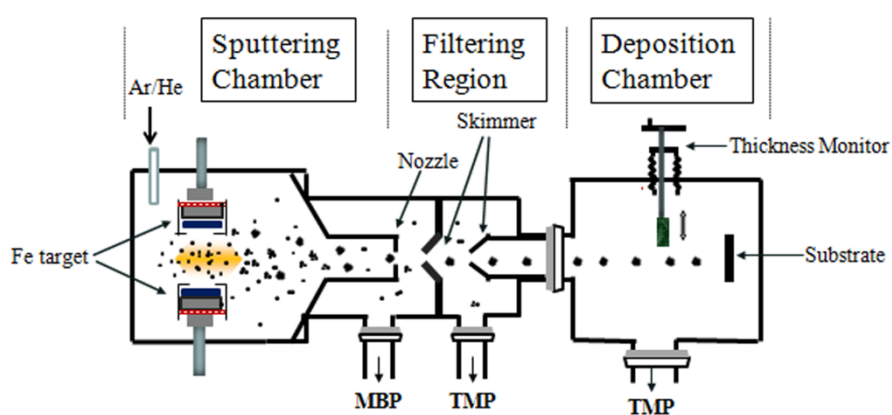

**Figure S1.** Schematic drawing of plasma-gas-condensation cluster deposition (PGCCD) system

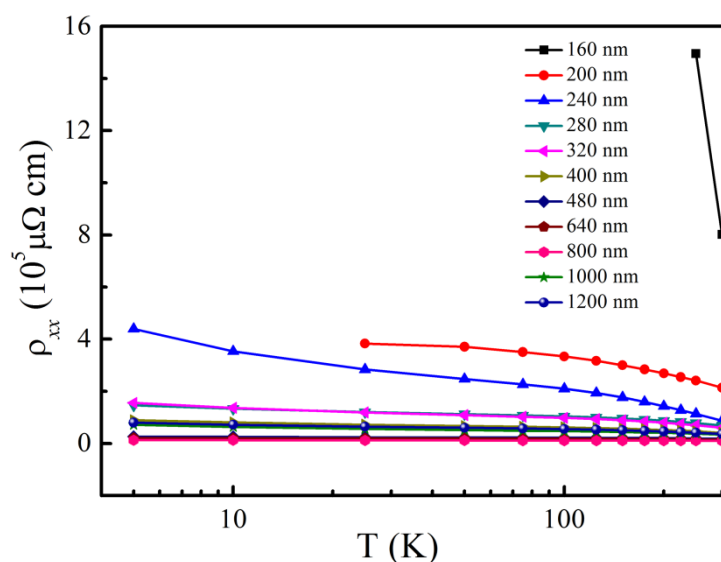

**Figure S2.**  $\rho_{xx}$ - $\log T$  curves of the Fe cluster-assembled films with different thicknesses.

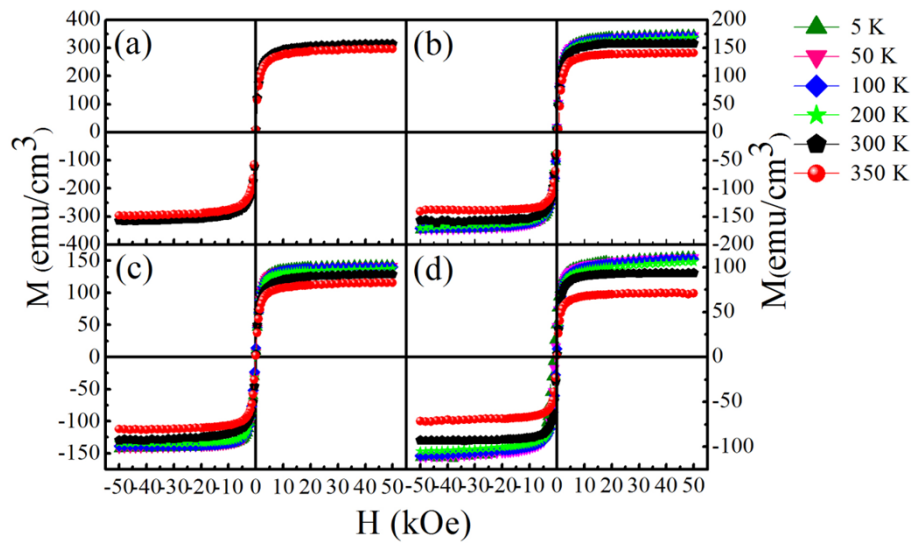

**Figure S3.**  $M$ - $H$  curves of the Fe cluster-assembled films with different thickness measured at different temperature: (a)  $t_a=160$  nm, (b)  $t_a=400$  nm, (c)  $t_a=640$  nm, (d)  $t_a=1200$  nm.

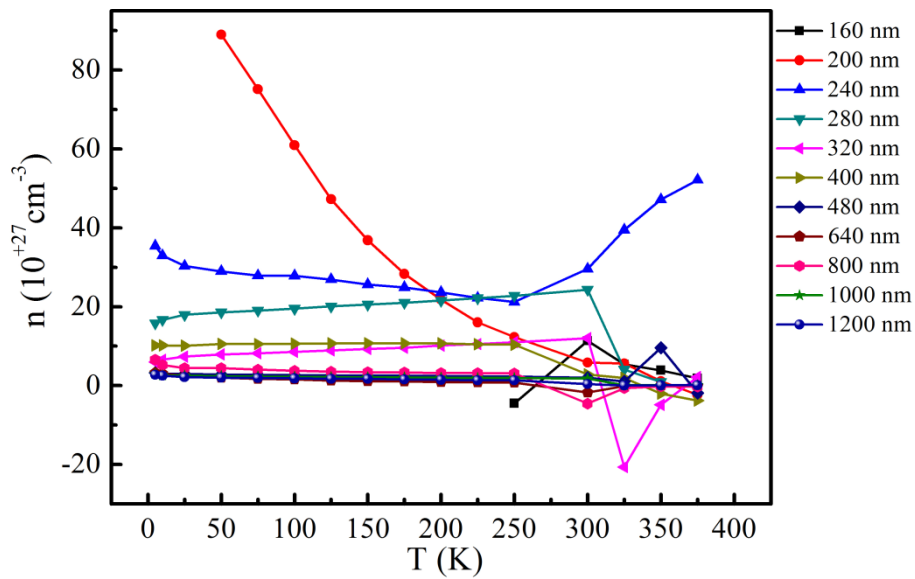

**Figure S4.** Carrier concentration ( $n$ ) extracted from the ordinary Hall coefficient versus  $T$  at different thickness.

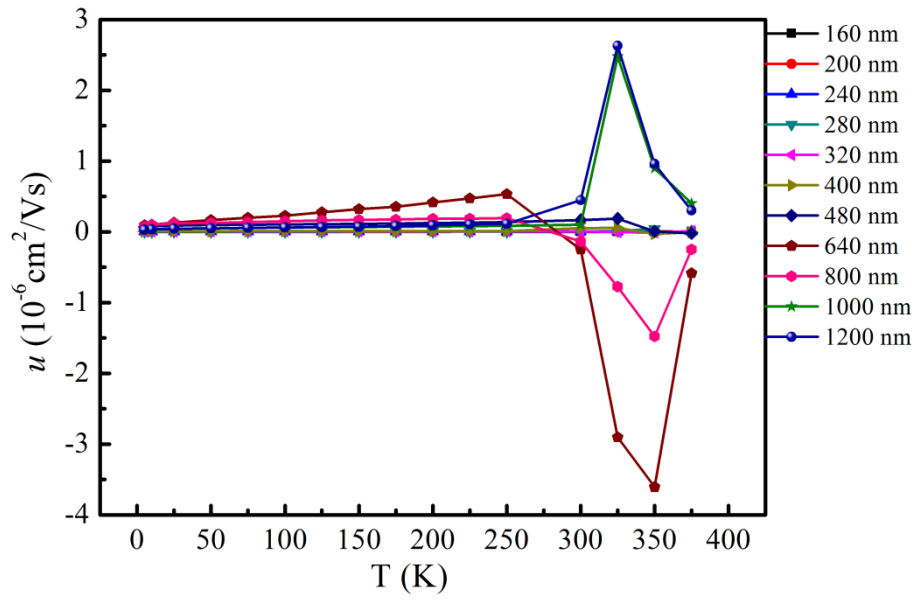

**Figure S5.** Carrier mobility ( $u$ ) extracted from the ordinary Hall coefficient and the resistivity versus  $T$  at different thickness.
